# Supplementary material for: Intestinal Fork Head Regulates Nutrient Absorption and Promotes Longevity
Source: PubMed Central journal article supplement (PMC5656751; doi:10.1016/j.celrep.2017.09.042), 2017-10-17
Supplement: mmc1.pdf [file mmc1.pdf]

**Cell Reports, Volume 21**

## **Supplemental Information**

### **Intestinal Fork Head Regulates Nutrient**

### **Absorption and Promotes Longevity**

**Ekin Bolukbasi, Mobina Khericha, Jennifer C. Regan, Dobril K. Ivanov, Jennifer Adcott, Miranda C. Dyson, Tobias Nespital, Janet M. Thornton, Nazif Alic, and Linda Partridge**

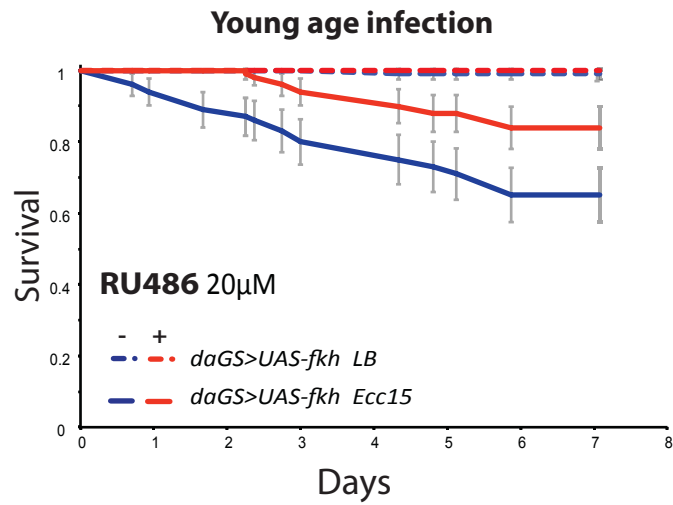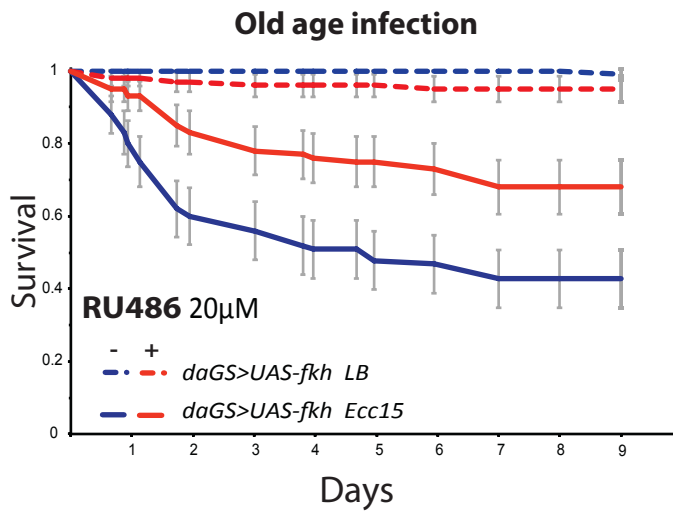

**Figure S1: Over-expression of *fkh* improves immune response to *Ecc15* . Related to Figure 1.** Survival curves of flies ubiquitously overexpressing *UAS-fkh* transgene under the control of *daGS* driver following systemic *Ecc15* infection or sham infection with LB only at 1 week of age (upper panel) or 7 weeks of age (lower panel). No significant difference in survival was observed at 20  $\mu$ M RU486 in Sham infected flies at young ( $p=0.317$ ) and old age ( $p=0.093$ ). Significant increase in survival following *Ecc15* infection was observed at 20  $\mu$ M RU486 at young ( $p=0.00014$ ) and old age ( $p=0.0001$ ).

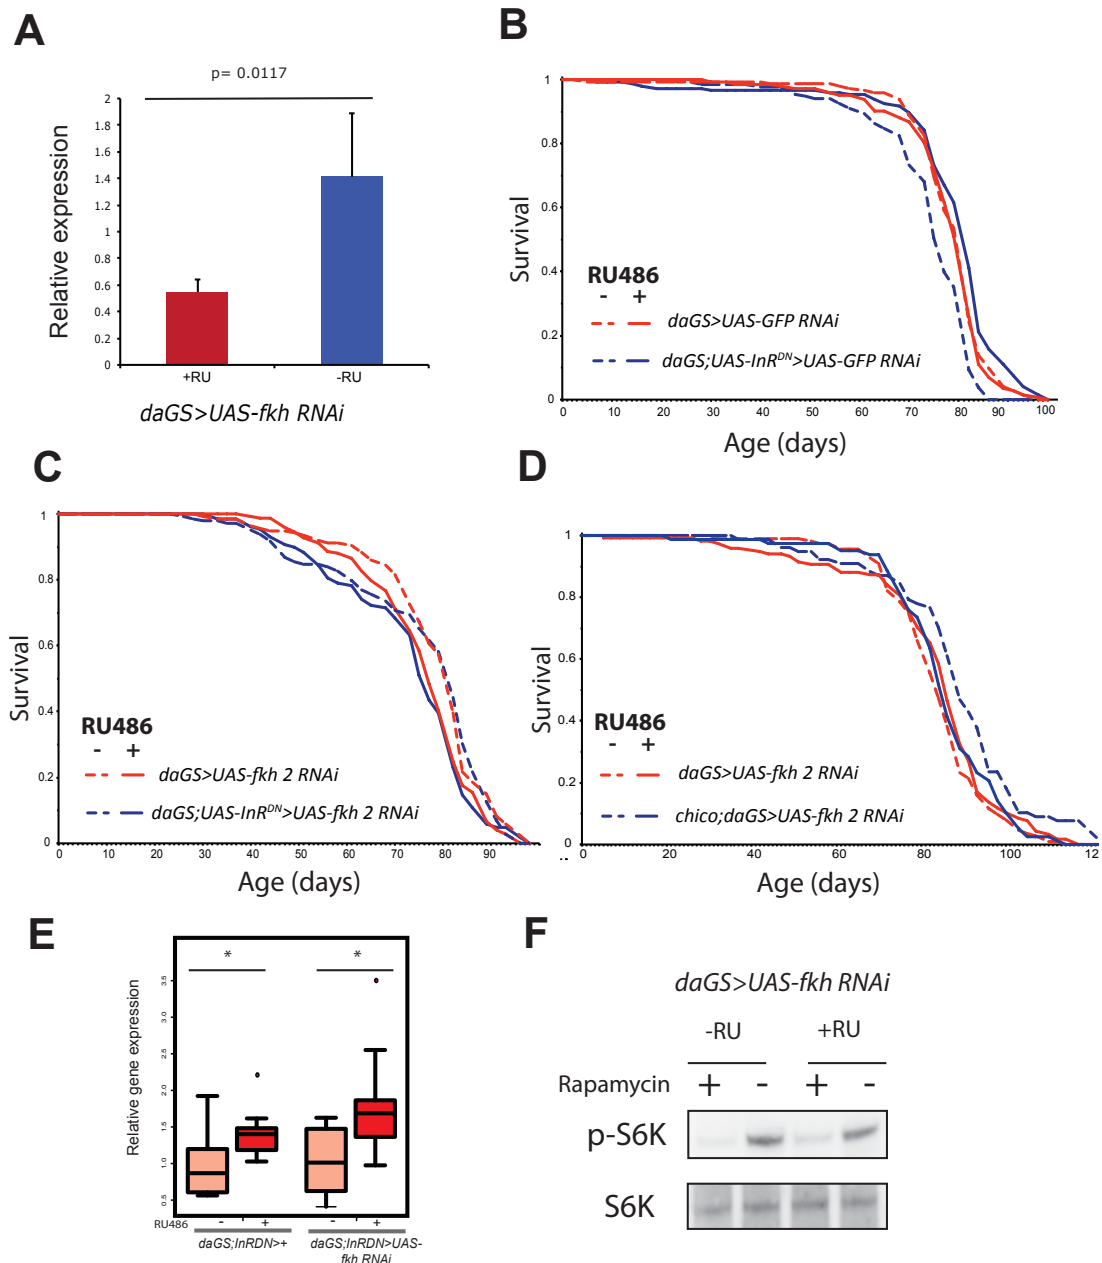

**Figure S2: Over-expression of *fkh RNAi 2* transgene abolishes lifespan extension observed upon reduced IIS activity and IIS and rapamycin still exert downstream biochemical effects upon *fkh RNAi*. Related to Figure 3. (A) *fkh* mRNA was quantified relative to *actin5C* by qPCR in whole flies of genotype *daGS>UAS-fkh RNAi* induced or not with 200  $\mu$ M RU486. Induction of *fkh RNAi* resulted in a significant decrease in *fkh* expression levels (Student's t-test,  $p < 0.05$ ,  $n=5$ , error bars represent SD). (B) *daGS;UAS-InR<sup>DN</sup>>UAS-GFP RNAi* females show increased lifespan in the presence of RU486 ( $p = 7.9 \times 10^{-11}$ ). Survival of *daGS >UAS-GFP RNAi* females was not different between -RU486 and +RU486 conditions ( $p = 0.78$ ). See also Table S6A (C) *daGS>UAS-fkh RNAi 2* and *daGS;UAS-InR<sup>DN</sup>>UAS-fkh RNAi 2* flies showed significantly decreased lifespan in the presence of RU486 ( $p = 0.0075$  and  $p = 0.0019$  respectively). Reduction of IIS via simultaneous over-expression of *UAS-InR<sup>DN</sup>* and *fkh RNAi 2* did not result in lifespan extension since no significant difference in survival was detected between *daGS>UAS-fkh RNAi 2* +RU486 and *daGS;UAS-InR<sup>DN</sup>>UAS-fkh RNAi 2* +RU486 flies ( $p = 0.62$ ). See also Table S6B. (D) *chico* mutation extended lifespan in *daGS>UAS-fkh RNAi 2* flies in the absence of RU486 ( $p = 0.00031$ ), but not in its presence ( $p = 0.802$ ). See also Table S6C. (E) *4EBP* mRNA was quantified relative to *tubulin* by qPCR in whole flies induced or not with 200  $\mu$ M RU486. Reduction of IIS resulted in a significant increase in *4EBP* levels in both wild type and *fkh RNAi* background (Student's t-test,  $p < 0.05$ ,  $n=9-10$ ). (F) Immunoblotting of whole fly extracts using phospho-specific and total dS6K antibodies reveals decreased pS6K levels upon rapamycin treatment in flies induced or not with 200  $\mu$ M RU486**

**A**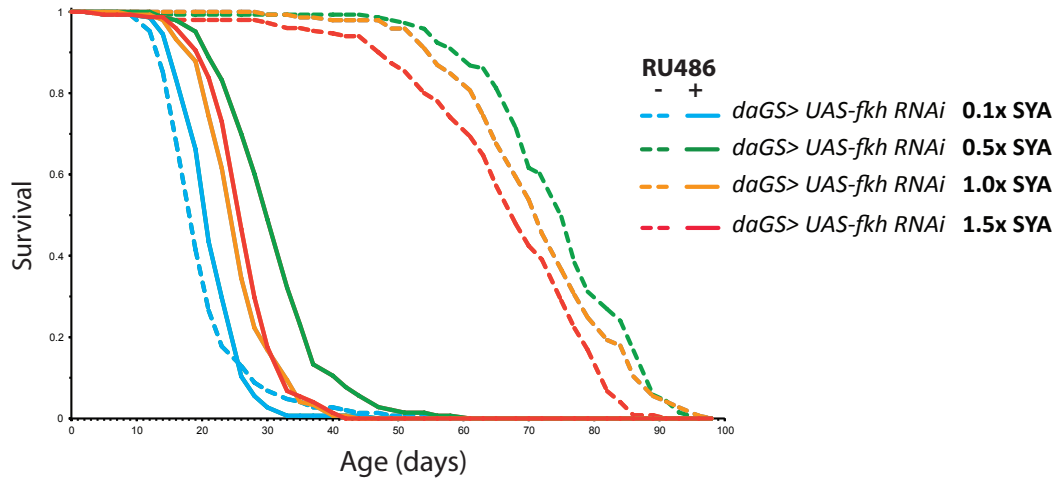**B**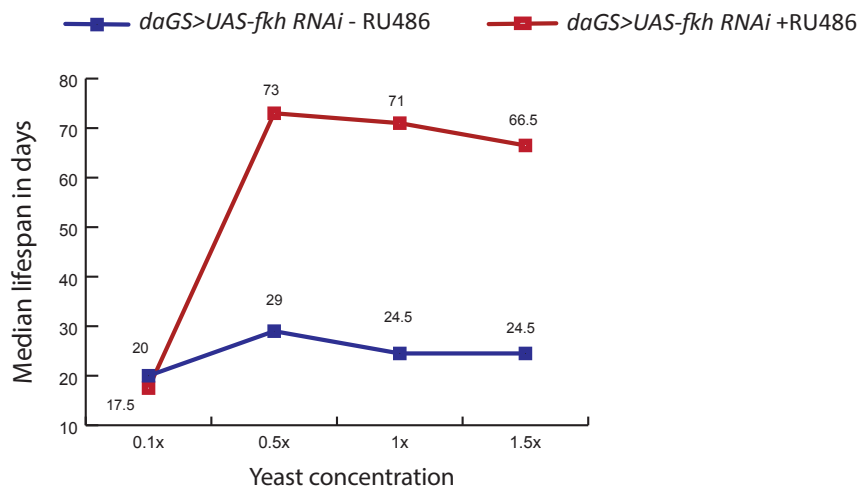

**Figure S3: FKH does not mediate the response of lifespan to DR. Related to Figure 3.** (A) Survival curves and (B) median lifespan values of *daGS> UAS-fkh RNAi* female flies in the presence or absence of RU486 and across different yeast concentrations (0.1x, 0.5x, 1.0x, and 1.5x yeast) on SYA food. Log-rank test revealed a significant difference in survival of *daGS>UAS-fkh RNAi* +RU486 flies at 0.5x yeast SYA food compared to *daGS>UAS-fkh RNAi* +RU486 flies at 1.0x and 1.5x yeast SYA food concentration ( $p= 1.36 \times 10^{-10}$  and  $p= 1.58 \times 10^{-9}$ , respectively). For -RU486 conditions, at 0.1xyeast n= 147 deaths /9 censurs , at 0.5xyeast n= 141 deaths /10 censurs, at 1.0xyeast n= 145 deaths /3 censurs, at 1.5xyeast n= 148 deaths /7 censurs. ). For +RU486 conditions, at 0.1xyeast n= 145 deaths /4 censurs , at 0.5xyeast n= 143 deaths /8 censurs, at 1.0xyeast n= 148 deaths /5 censurs, at 1.5xyeast n= 148 deaths /4 censurs.

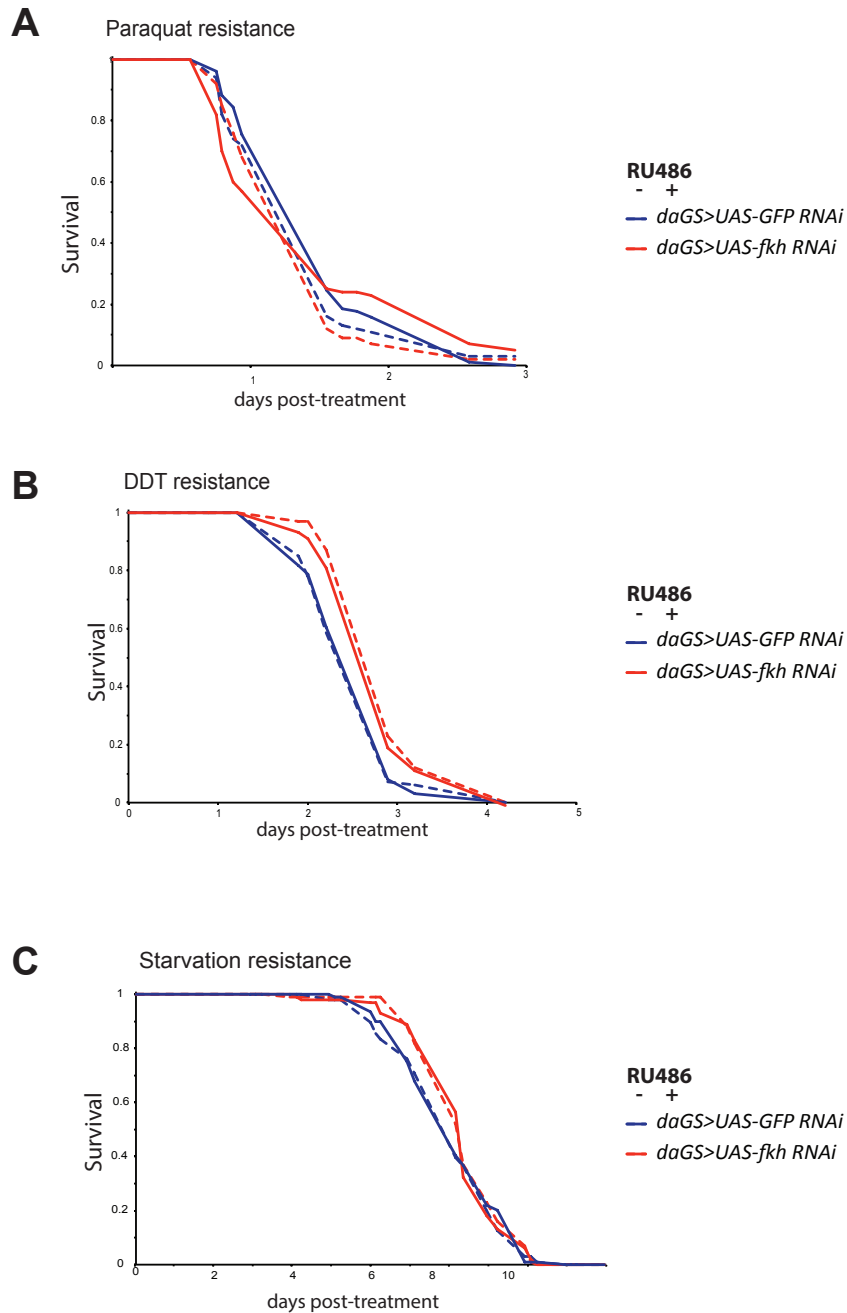

**Figure S4: Over-expression of *GFP RNAi* or *fkh RNAi* alone does not affect stress resistance. Related to Figure 4.** (A-C) Survival curves in response to paraquat treatment, DDT treatment and amino acid starvation of female flies induced to ubiquitously express either *UAS-GFP-RNAi* or *UAS-fkh-RNAi* transgenes (*daGS >UAS-GFP RNAi* or *daGS >UAS-fkh RNAi*) by using RU486 compared with uninduced controls. No significant difference in lifespan was observed between + and - RU486 conditions for *daGS >GFP RNAi* and for *daGS >fkh RNAi* upon (A) paraquat treatment ( $p= 0.072$  and  $p=0.73$  respectively), (B) DDT feeding ( $p= 0.93$  and  $p=0.44$  respectively) and (C) amino acid starvation ( $p= 0.78$  and  $p=0.48$  respectively). See also Table S7.

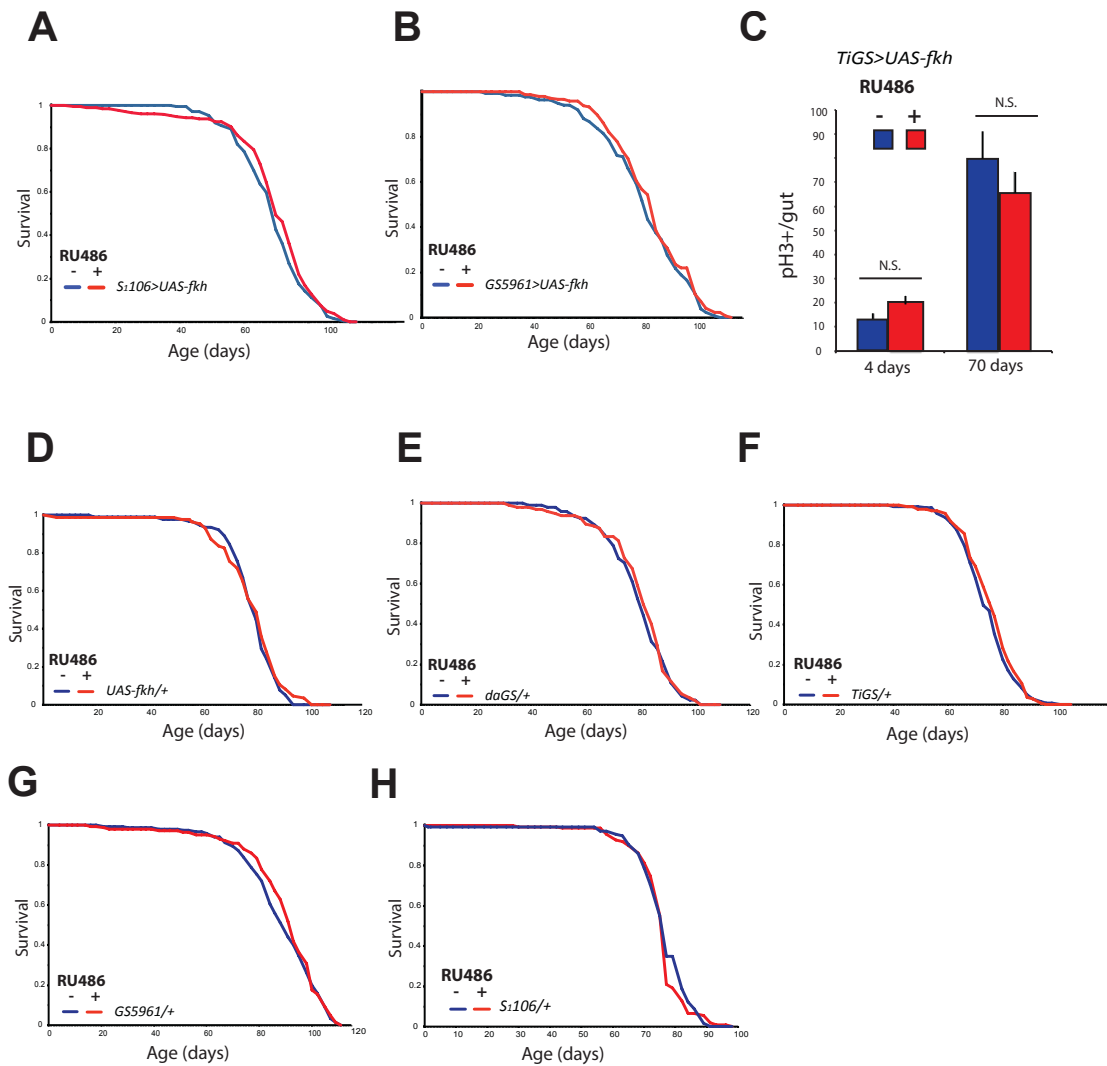

**Figure S5: Overexpression of FKH in the progenitor cells does not affect lifespan and intestinal FKH up-regulation does not affect ISC proliferation. Related to Figure 5.** (A) Adult abdominal fat body and gut specific over-expression of *fkh* transgene under the control of *S1106* driver did not affect lifespan ( $p=0.093$ ). (B) ISC and EB specific over-expression of the *fkh* transgene under the control of *GS5961* driver did not affect lifespan ( $p=0.21$ ). (C) Quantification of pH3+ cells per gut at 4 and 70 days of age in flies of genotype *TiGS>UAS-fkh* showed no difference in mitoses between – and + RU486 conditions in young and old flies (Student’s t-test,  $p=0.42$  and  $p=0.51$ ,  $n=19$  to 22 guts per condition, error bars represent SEM). See Also Table S8 A-B. (D) Presence of RU486 in the food did not affect survival of flies with *UAS-fkh* transgene alone ( $p=0.48$ ), (E) *daGS* driver alone ( $p=0.67$ ), (F) *TiGS* driver alone ( $p=0.294$ ), (G) *GS5961* driver alone ( $p=0.38$ ) and (H) *S1106* driver alone ( $p=0.42$ ). See also Table S8 C-G

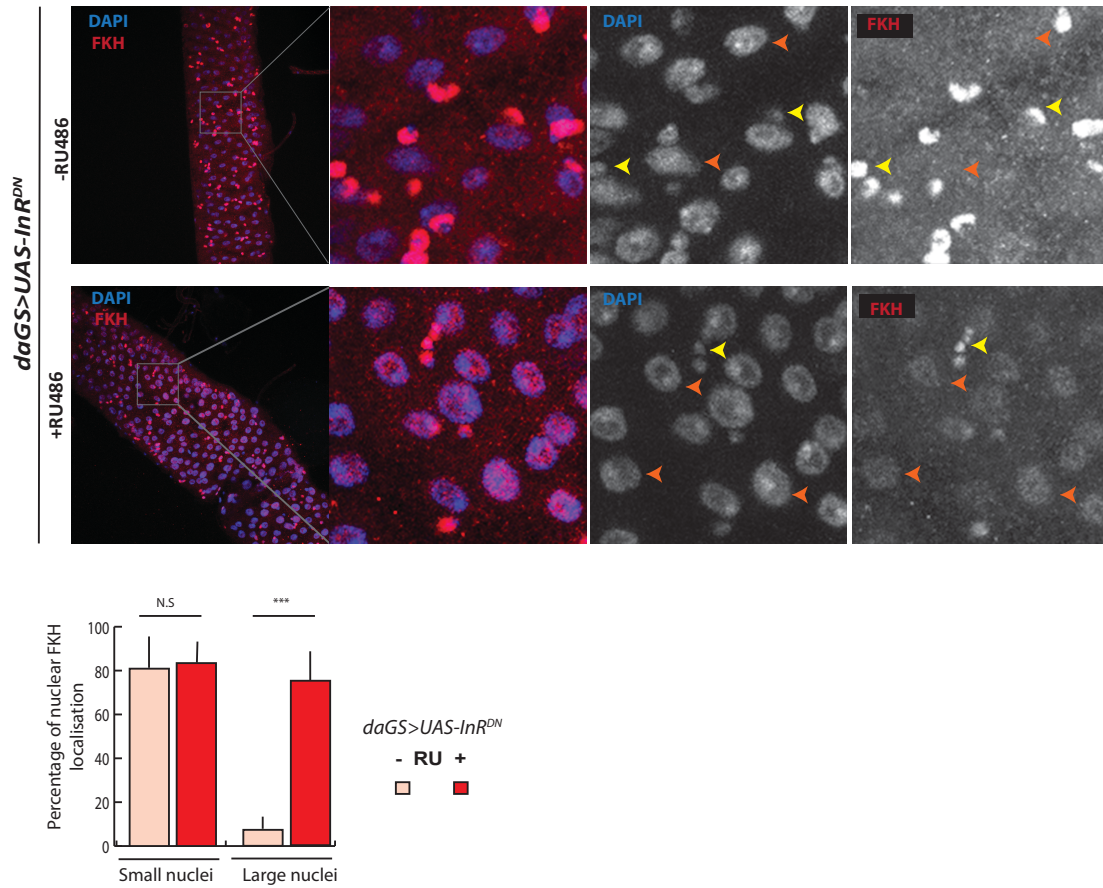

**Figure S6: Reduced IIS leads nuclear localization of FKH in enterocytes. Related to Figure 6.** *Drosophila* adult guts were dissected from flies of genotype *daGS>UAS-InR<sup>DN</sup>* induced or not with 200  $\mu$ M RU486. Endogenous FKH (red) and DAPI-stained nuclei (blue) were visualized by immunofluorescence in the mid-gut. Nuclear FKH localisation was quantified in two cell subtypes characterized by small and larger nuclei. Small nuclei and large nuclei are indicated by yellow and orange arrowheads respectively. Percentage of nuclear FKH staining was dramatically increased specifically in cells with large nuclei in the +RU486 condition (Student's t-test,  $p < 0.0001$ ,  $n=5$ ) whereas it remained unchanged in cells with smaller nuclei (Student's t-test,  $p=0.78$ ,  $n=5$ , error bars represent SD).

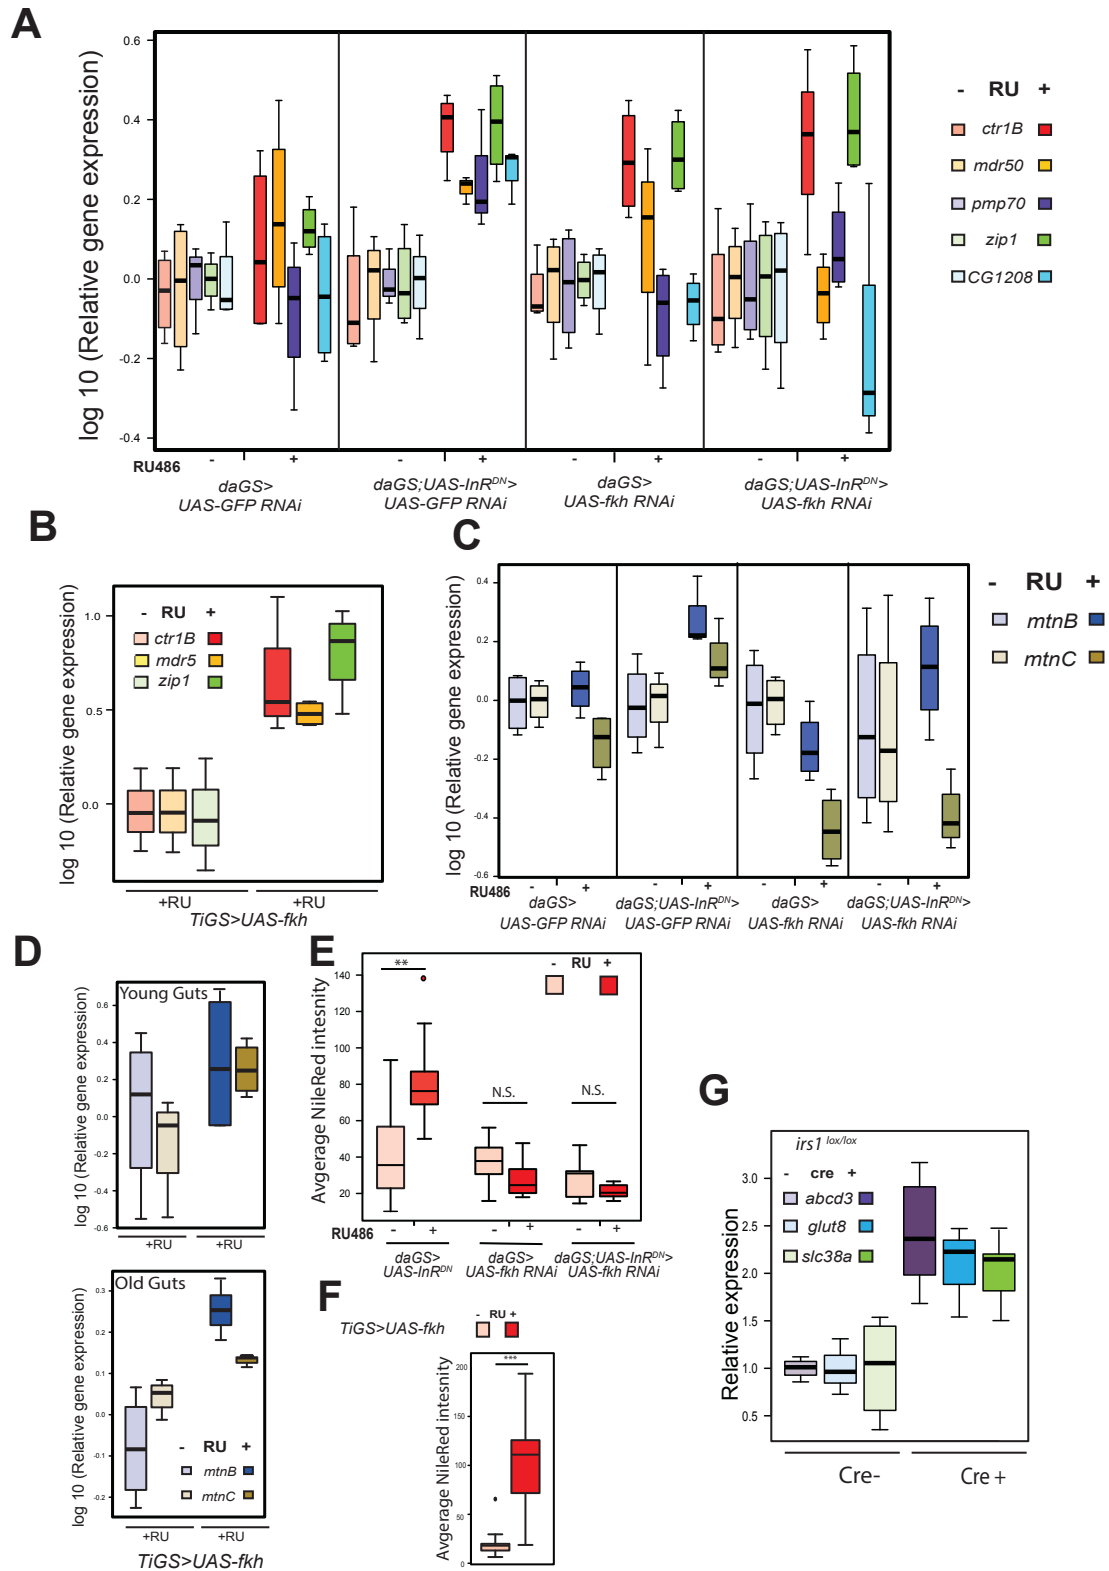

**Figure S7: Expression of nutrient transporters and nutrient uptake is increased in the gut upon reduced IIS and FKH overexpression. Related to Figures 6 and 7.** (A) *ctr1B*, *mdr50*, *zip1*, *pmp70* and *CG1208* mRNAs were quantified relative to *actin5C* by qPCR in guts of *daGS >UAS-GFP RNAi*, *daGS;UAS-InR<sup>DN</sup>>UAS-GFP RNAi*, *daGS >UAS-fkh RNAi* and *daGS;UAS-InR<sup>DN</sup>>UAS-fkh RNAi* flies induced or not with RU486. Boxplots show log<sub>10</sub> derived relative expression with – RU486 values set to zero. Data were analyzed with a linear model and the effects of the interaction between RU486 and genotype was significant ( $p=0.0004$ ,  $n=3-4$ ), whereas 3-way interaction between RU486, genotype and different gene categories was not significant ( $p=0.2923$ ). *daGS;UAS-InR<sup>DN</sup>>UAS-GFP RNAi* +RU condition showed significantly increased expression levels and was different from all other



conditions (t-test,  $p < 0.05$ ,  $n = 3-4$ ). (B) *ctr1B*, *mdr50* and *zip1* mRNA levels quantified relative to *actin5C* by qRT-PCR in adult guts isolated from flies of genotype *TiGS > UAS-fkh* induced or not with 200  $\mu\text{M}$  RU486. Boxplots show log-10 derived relative expression with - RU486 values set to zero. Induction of *fkh* resulted in a significant increase in *ctr1B*, *mdr50* and *zip1* expression levels (Student's t-test,  $p = 0.02$ ,  $p = 0.006$  and  $p = 0.007$  respectively,  $n = 4$ ). (C) *mtnB* and *mtnC* mRNAs were quantified relative to *actin5C* by qPCR in guts of *daGS > UAS-GFP RNAi*, *daGS; UAS-InR<sup>DN</sup> > UAS-GFP RNAi*, *daGS > UAS-fkh RNAi* and *daGS; UAS-InR<sup>DN</sup> > UAS-fkh RNAi* flies induced or not with 200  $\mu\text{M}$  RU486. Boxplots show log-10 derived relative expression with - RU486 values set to zero. Data were analyzed with a linear model. The effect of interaction between RU and genotype was significant ( $p = 0.0015$ ,  $n = 3-4$ ) and the 3-way interaction between RU, genotype and different gene categories was not significant ( $p = 0.5065$ ,  $n = 3-4$ ). *daGS; UAS-InR<sup>DN</sup> > UAS-GFP RNAi* +RU condition was different from all others (t-test,  $p < 0.05$ ,  $n = 3-4$ ). (D) *mtnB* and *mtnC* mRNA levels quantified relative to *actin5C* by qPCR in young and old adult guts isolated from flies of genotype *TiGS > UAS-fkh* induced or not with 200  $\mu\text{M}$  RU486. Boxplots show log-10 derived relative expression. Induction of *fkh* resulted in a significant increase in *mtnC* expression levels in young and old guts (t-test,  $p = 0.02$  and  $p = 0.005$  respectively,  $n = 4$ ) and in a significant increase in *mtnB* expression levels in old guts (t-test,  $p = 0.01$ ,  $n = 4$ ). (E) Quantification of the NileRed staining of the anterior region of mid-guts isolates from flies of genotypes *daGS > UAS-InR<sup>DN</sup>*, *daGS; UAS-InR<sup>DN</sup> > UAS-fkh RNAi* and *daGS > UAS-fkh RNAi* induced or not with 200  $\mu\text{M}$  RU486. Boxplots show quantification of NileRed intensity in arbitrary units. NileRed staining is significantly increased in +RU486 condition of genotype *daGS > UAS-InR<sup>DN</sup>* (t-test,  $p = 0.0019$ ,  $n = 9-11$ ). No significance was detected between + and - RU486 conditions of genotypes *daGS; UAS-InR<sup>DN</sup> > UAS-fkh RNAi* and *daGS > UAS-fkh RNAi* (t-test,  $p = 0.094$  and  $p = 0.059$ , respectively,  $n = 9-11$ ). (F) Quantification of the NileRed staining of the anterior region of mid-guts isolates from flies of genotype *TiGS > UAS-fkh* induced or not with 200  $\mu\text{M}$  RU486. Boxplots show quantification of NileRed intensity in arbitrary units. NileRed staining is significantly increased in RU486 condition part of the mid-gut (t-test,  $p = 2.26 \times 10^{-8}$ ,  $n = 15-19$ ). (G) *Abcd3*, *Glut8* and *Slc39a3* mRNA levels quantified relative to *actin* by qPCR in duodenum of 3 month old female mice of genotype *Irs1<sup>lox/lox</sup>* (control) and *VillCre::Irs1<sup>lox/lox</sup>* (*Irs1* knock-out). Boxplots show relative expression with control values set to 1. *Irs1* knock-out resulted in a significant increase in *Abcd3*, *Glut8* and *Slc39a* expression levels (Student's t-test,  $p = 0.006562$ ,  $p = 0.029$  and  $p = 0.019$  respectively,  $n = 3-4$ ).

**Table S1- Ubiquitous FKH over expression extends lifespan. Related to Figure 1.**

**A. Survival data for daGS>UAS-fkh (related to Figure 1A)**

| Genotype/Treatment | Med Lifespan (days) | Max lifespan (days) | n Dead | n Censored | % Median Increase | % Maximum Increase | p-value (log rank) vs control |
|--------------------|---------------------|---------------------|--------|------------|-------------------|--------------------|-------------------------------|
| Repeat 1           |                     |                     |        |            |                   |                    |                               |
| RU486-             | 79                  | 95.5                | 93     | 5          |                   |                    |                               |
| 10 uM RU486        | 86                  | 107                 | 93     | 1          | 8.86              | 12.0418848         | 6.95E-06                      |
| 50 uM RU486        | 84                  | 102.5               | 98     | 2          | 6.33              | 7.32984293         | 0.017708512                   |
| 100 uM RU486       | 81.5                | 101                 | 92     |            | 3.16              | 5.7591623          | 0.181253206                   |
| 200 uM RU486       | 52                  | 93                  | 105    | 1          | -34.18            | -2.617801          | 2.88501E-07                   |

**A. Survival data for daGS>UAS-fkh (related to Figure 1A)**

| Genotype/Treatment | Med Lifespan (days) | Max lifespan (days) | n Dead | n Censored | % Median Increase | % Maximum Increase | p-value (log rank) vs control |
|--------------------|---------------------|---------------------|--------|------------|-------------------|--------------------|-------------------------------|
| Repeat 1           |                     |                     |        |            |                   |                    |                               |
| RU486-             | 78                  | 98                  | 90     | 4          |                   |                    |                               |
| 10 uM RU486        | 85                  | 101                 | 91     | 5          | 8.97              | 3.06122449         | 0.003                         |
| 20 uM RU486        | 89.5                | 102                 | 89     | 4          | 14.74359          | 4.08163265         | 6.3303E-06                    |

**Table S2- FKH is required for reduced IIS and rapamycin induced longevity. Related to Figure 3.**

**A. Survival data for daGS;UAS-InRDN>GFP RNAi +/-RU486 (related to Figure 3A)**

| Genotype/Treatment        | Med Lifespan (days) | Max Lifespan (days) | n Dead | n Censored | % Median change (vs -RU) | % Maximum change (vs -RU) | p-value (log rank) vs control |
|---------------------------|---------------------|---------------------|--------|------------|--------------------------|---------------------------|-------------------------------|
| Repeat 1                  |                     |                     |        |            |                          |                           |                               |
| daGS>GFP RNAiRU486-       | 62                  | 78                  | 150    | 0          |                          |                           |                               |
| daGS>GFP RNAiRU486+       | 66.5                | 73.5                | 146    | 4          |                          |                           | 0.50                          |
| daGS;InRDN>GFP RNAiRU486- | 64                  | 78                  | 140    | 10         |                          |                           |                               |
| daGS;InRDN>GFP RNAiRU486+ | 73.5                | 80.5                | 146    | 4          | 14.84                    | 3.205128205               | 4.45E-10                      |
| Repeat 2                  |                     |                     |        |            |                          |                           |                               |
| daGS>GFP RNAiRU486-       | 74.0                | 85.5                | 141    | 11         |                          |                           |                               |
| daGS>GFP RNAiRU486+       | 74.0                | 85.5                | 148    | 12         |                          |                           | 0.918433719                   |
| daGS;InRDN>GFP RNAiRU486- | 71.5                | 83.0                | 140    | 5          |                          |                           |                               |
| daGS;InRDN>GFP RNAiRU486+ | 78.5                | 92.5                | 147    | 12         | 9.79                     | 11.45                     | 3.62E-09                      |

**B. Survival data for daGS;UAS-InRDN>fkh RNAi +/-RU486 (related to Figure 3B)**

| Genotype/Treatment        | Med Lifespan (days) | Max Lifespan (days) | n Dead | n Censored | % Median change (vs -RU)  | % Maximum change (vs -RU) | p-value (log rank) |
|---------------------------|---------------------|---------------------|--------|------------|---------------------------|---------------------------|--------------------|
| Repeat 1                  |                     |                     |        |            |                           |                           |                    |
| daGS>fkh RNAiRU486-       | 76                  | 90.5                | 130    | 5          |                           |                           |                    |
| daGS>fkh RNAiRU486+       | 36                  | 52.5                | 146    | 2          | -52.63157895              | -41.99                    | 1.97E-54 (vs RU-)  |
| daGS;InRDN>fkh RNAiRU486- | 80.5                | 94.5                | 131    | 8          |                           |                           |                    |
| daGS;InRDN>fkh RNAiRU486+ | 31.5                | 59.5                | 150    | 7          | -60.87                    | -37.04                    | 2.59E-63 (vs RU-)  |
|                           |                     |                     |        |            | daGS>fkh RNAiRU486        | vs.                       | <b>0.08</b>        |
|                           |                     |                     |        |            | daGS;InRDN>fkh RNAiRU486+ |                           |                    |

| Genotype/Treatment        | Med Lifespan (days) | Max Lifespan (days) | n Dead | n Censored | % Median change (vs -RU)  | % Maximum change (vs -RU) | p-value (log rank) |
|---------------------------|---------------------|---------------------|--------|------------|---------------------------|---------------------------|--------------------|
| Repeat 2                  |                     |                     |        |            |                           |                           |                    |
| daGS>fkh RNAiRU486-       | 76                  | 92.5                | 154    | 4          |                           |                           |                    |
| daGS>fkh RNAiRU486+       | 31.5                | 43.5                | 143    | 0          | -58.55                    | -52.97                    | 1.54 (vs RU-)      |
| daGS;InRDN>fkh RNAiRU486- | 76                  | 85.5                | 136    | 9          |                           |                           |                    |
| daGS;InRDN>fkh RNAiRU486+ | 32                  | 50.5                | 154    | 8          | -57.89                    | -40.94                    | 3.07(vs RU-)       |
|                           |                     |                     |        |            | daGS>fkh RNAiRU486+       |                           | <b>0.11</b>        |
|                           |                     |                     |        |            | daGS;InRDN>fkh RNAiRU486+ |                           |                    |

**C.Survival data for daGS;chico> GFP RNAi(related to Figure 3C)**

| Genotype/Treatment        | Med Lifespan (days) | Max Lifespan (days) | n Dead | n Censored | % Median change (vs wt) | % Maximum change (vs wt) | p-value (log rank) |
|---------------------------|---------------------|---------------------|--------|------------|-------------------------|--------------------------|--------------------|
| Repeat 1                  |                     |                     |        |            |                         |                          |                    |
| daGS>GFP RNAiRU486-       | 83                  | 97                  | 142    | 1          |                         |                          |                    |
| daGS>GFP RNAiRU486+       | 85                  | 96                  | 152    | 3          |                         |                          |                    |
| chico;daGS>GFP RNAiRU486- | 90                  | 108.5               | 90     | 0          | 8.43                    | 11.86                    | 2.71E-06           |
| chico;daGS>GFP RNAiRU486+ | 90                  | 106                 | 89     | 5          | 5.88                    | 10.42                    | 6.28E-07           |

**D.Survival data for daGS;chico> UAS-fkh RNAi(related to Figure 3D)**

| Genotype/Treatment        | Median Lifespan (days) | Maximum lifespan | n Dead | n Censored | % Median change (vs wt) | % Maximum change (vs wt) | p-value (log rank) |
|---------------------------|------------------------|------------------|--------|------------|-------------------------|--------------------------|--------------------|
| Repeat 1                  |                        |                  |        |            |                         |                          |                    |
| daGS>fkh RNAiRU486-       | 83                     | 97               | 127    | 2          |                         |                          |                    |
| daGS>fkh RNAiRU486+       | 37                     | 64               | 113    | 1          |                         |                          |                    |
| chico;daGS>fkh RNAiRU486- | 90                     | 113              | 115    | 2          | 8.43                    | 16.49                    | 3.89E-08           |
| chico;daGS>fkh RNAiRU486+ | 38                     | 66.5             | 122    | 2          | 2.70                    | 3.91                     | 0.61               |
| Repeat 2                  |                        |                  |        |            |                         |                          |                    |
| daGS>fkh RNAiRU486-       | 73                     | 82.5             | 144    | 3          |                         |                          |                    |
| daGS>fkh RNAiRU486+       | 29                     | 49               | 142    | 1          |                         |                          |                    |
| chico;daGS>fkh RNAiRU486- | 75.5                   | 89.5             | 142    | 3          | 3.42                    | 8.48                     | 2.06E-04           |
| chico;daGS>fkh RNAiRU486+ | 26.5                   | 47.5             | 150    | 0          | -8.62                   | -3.06                    | 0.15               |

**E.Survival data for daGS> UAS-fkh RNAi +/- rapamycin (related to Figure 3E)**

| Genotype/Treatment        | Median Lifespan (days) | Maximum lifespan | n Dead | n Censored | % Median change (vs -Rapa) | % Maximum change (vs -Rapa) | p-value (log rank) |
|---------------------------|------------------------|------------------|--------|------------|----------------------------|-----------------------------|--------------------|
| Repeat 1                  |                        |                  |        |            |                            |                             |                    |
| daGS>fkh RNAiRU486-       | 69                     | 73.5             | 147    | 5          |                            |                             |                    |
| daGS>fkh RNAiRU486+       | 24.5                   | 31.5             | 150    | 3          |                            |                             |                    |
| daGS>fkh RNAiRU486- Rapa+ | 73.5                   | 80.5             | 137    | 12         | 6.52                       | 9.52                        | 2.37E-08           |
| daGS>fkh RNAiRU486+ Rapa+ | 24.5                   | 31.5             | 146    | 4          |                            | 0.00                        | 0.82               |
| Repeat 2                  |                        |                  |        |            |                            |                             |                    |
| daGS>fkh RNAiRU486-       | 69.0                   | 78.0             | 128    | 5          |                            |                             |                    |
| daGS>fkh RNAiRU486+       | 27.0                   | 45.5             | 114    | 10         |                            |                             |                    |
| daGS>fkh RNAiRU486- Rapa+ | 73.5                   | 89.0             | 106    | 8          | 6.52                       | 14.10                       | 3.05E-04           |
| daGS>fkh RNAiRU486+ Rapa+ | 27.0                   | 41.0             | 125    | 3          |                            | -9.89                       | 0.34               |

**Table S3- Details of CPH analysis. Related to Figures 3, 4AC and 5C.**

**A. Lifespan daGS;UAS-InRDN> +/- fkh RNAi(related to Figure 3AB)**

**Cox Proportional Hazard (CPH) analysis**

| Coefficient             | estimate | exp(coeff) | SE (coeff) | z      | p            |
|-------------------------|----------|------------|------------|--------|--------------|
| RU486                   | 0.07415  | 1.07697    | 0.12121    | 0.612  | 0.5407       |
| InRDN                   | -0.32604 | 0.72178    | 0.12152    | -2.683 | 0.0073 **    |
| fkh RNAi                | -1.35544 | 0.25783    | 0.12946    | -10.47 | < 2e-16 ***  |
| RU486:InRDN             | -0.67008 | 0.51167    | 0.17101    | -3.918 | 8.91e-05 *** |
| RU486:fkh RNAi          | 3.31408  | 27.49708   | 0.18504    | 17.91  | < 2e-16 ***  |
| InRDN:fkh RNAi          | 0.12494  | 1.13308    | 0.17424    | 0.717  | 0.4733       |
| RU486:InRDN vs fkh RNAi | 0.48914  | 1.63091    | 0.24198    | 2.021  | 0.0432 *     |

**B. Lifespan daGS;chico> +/- fkh RNAi(related to Figure 3CD)**

**Cox Proportional Hazard (CPH) analysis**

| Coefficient             | estimate | exp(coeff) | SE (coeff) | z      | p            |
|-------------------------|----------|------------|------------|--------|--------------|
| RU486                   | -0.05856 | 0.94312    | 0.1355     | -0.432 | 0.66563      |
| chico                   | -0.66237 | 0.51563    | 0.13714    | -4.83  | 1.37e-06 *** |
| fkh RNAi                | -0.15165 | -0.15165   | 0.12239    | -1.239 | 0.21533      |
| RU486 : chico           | 0.08379  | 1.0874     | 0.19071    | 0.439  | 0.66039      |
| RU486 : fkh RNAi        | 3.4651   | 31.97972   | 0.21699    | 15.969 | < 2e-16 ***  |
| chico : fkhRNAi         | -0.18896 | 0.82782    | 0.18949    | -0.997 | 0.31868      |
| RU486:chico vs fkh RNAi | 0.76163  | 2.14177    | 0.26825    | 2.839  | 0.00452 **   |

**C. Lifespan daGS> fkh RNAi +/- rapamycin (related to Figure 3E)**

**Cox Proportional Hazard (CPH) analysis**

| Coefficient       | estimate | exp(coeff) | SE (coeff) | z      | p            |
|-------------------|----------|------------|------------|--------|--------------|
| RU486             | 4.1513   | 63.5159    | 0.2791     | 14.876 | < 2e-16 ***  |
| Rapamycin         | -0.6045  | 0.5464     | 0.1225     | -4.936 | 7.99e-07 *** |
| RU486 : Rapamycin | 0.5865   | 1.7976     | 0.1698     | 3.454  | 0.000552 *** |

**D. Paraquat resistance daGS;UAS-InRNDN> +/- fkh RNAi(related to Figure 4A)**

**Cox Proportional Hazard (CPH) analysis**

| Coefficient    | estimate | exp(coeff) | SE (coeff) | z      | p          |
|----------------|----------|------------|------------|--------|------------|
| RU486          | -0.4351  | 0.6472     | 0.1486     | -2.928 | 0.00342 ** |
| fkh RNAi       | -0.2492  | 0.7794     | 0.1503     | 6.996  | 0.07896    |
| RU486: fkhRNAi | -0.1071  | 0.8985     | 0.2052     | -0.522 | 0.60192    |

**E. Starvation resistance daGS;UAS-InRNDN> +/- fkh RNAi(related to Figure 4C)**

**Cox Proportional Hazard (CPH) analysis**

| Coefficient    | estimate | exp(coeff) | SE (coeff) | z      | p            |
|----------------|----------|------------|------------|--------|--------------|
| RU486          | -0.59455 | 0.55181    | 0.14653    | -4.057 | 4.96e-05 *** |
| fkh RNAi       | 0.07632  | 1.07931    | 0.13956    | 0.547  | 0.584        |
| RU486: fkhRNAi | 0.83095  | 2.29551    | 0.20347    | 4.084  | 4.43e-05 *** |

**F. Lifespan TiGS> fkh RNAi +/- rapamycin (related to Figure 5C)**

**Cox Proportional Hazard (CPH) analysis**

| Coefficient       | estimate | exp(coeff) | SE (coeff) | z       | p            |
|-------------------|----------|------------|------------|---------|--------------|
| RU486             | 0.02691  | 1.02728    | 0.02054    | 1.31    | 0.19         |
| Rapamycin         | -0.24298 | 0.78429    | 0.01997    | -12.167 | < 2e-16 ***  |
| RU486 : Rapamycin | 0.22289  | 1.24968    | 0.02861    | 7.792   | 6.66e-15 *** |

**Table S4- FKH is required for IIS-induced starvation resistance. Related to Figure 4A-C.**

**A. Paraquat resistance data for *daGS;UAS-InRDN>GFP RNAi* or *FKH RNAi +/-RU486* (related to Figure 4A)**

| Genotype/Treatment                  | Med Survival (days) | Max Survival (days) | n Dead | p-value (log rank) vs -RU |
|-------------------------------------|---------------------|---------------------|--------|---------------------------|
| Repeat 1                            |                     |                     |        |                           |
| <i>daGS;InRDN&gt;GFP RNAiRU486-</i> | 1.24                | 2.23                | 99     |                           |
| <i>daGS;InRDN&gt;GFP RNAiRU486+</i> | 1.24                | -                   | 85     | 5.89E-04                  |
| <i>daGS;InRDN&gt;fkh RNAiRU486-</i> | 1.24                | 2.23                | 103    |                           |
| <i>daGS;InRDN&gt;fkh RNAiRU486+</i> | 2.23                | 2.23                | 98     | 1.47E-07                  |

| Genotype/Treatment                  | Med Survival (days) | Max Survival (days) | n Dead | p-value (log rank) vs -RU |
|-------------------------------------|---------------------|---------------------|--------|---------------------------|
| Repeat 2                            |                     |                     |        |                           |
| <i>daGS;InRDN&gt;GFP RNAiRU486-</i> | 0.60                | 2.13                | 94     |                           |
| <i>daGS;InRDN&gt;GFP RNAiRU486+</i> | 1.15                | 7.92                | 100    | 4.43244E-05               |
| <i>daGS;InRDN&gt;fkh RNAiRU486-</i> | 0.60                | 1.56                | 98     |                           |
| <i>daGS;InRDN&gt;fkh RNAiRU486+</i> | 1.04                | 3.56                | 97     | 4.98E-10                  |

**B. DDT resistance data for *daGS;UAS-InRDN>GFP RNAi* or *FKH RNAi +/-RU486* (related to Figure 4B)**

| Genotype/Treatment                  | Med Survival (days) | Max Survival (days) | n Dead | p-value (log rank) vs -RU |
|-------------------------------------|---------------------|---------------------|--------|---------------------------|
| Repeat 1                            |                     |                     |        |                           |
| <i>daGS;InRDN&gt;GFP RNAiRU486-</i> | 2.6                 | 3.7                 | 90     |                           |
| <i>daGS;InRDN&gt;GFP RNAiRU486+</i> | 3.7                 | -                   | 88     | 1.34E-03                  |
| <i>daGS;InRDN&gt;fkh RNAiRU486-</i> | 2.6                 | 3.7                 | 96     |                           |
| <i>daGS;InRDN&gt;fkh RNAiRU486+</i> | 2.6                 | 3.7                 | 92     | 2.80E-04                  |

| Genotype/Treatment                  | Med Survival (days) | Max Survival (days) | n Dead | p-value (log rank) vs -RU |
|-------------------------------------|---------------------|---------------------|--------|---------------------------|
| Repeat 2                            |                     |                     |        |                           |
| <i>daGS;InRDN&gt;GFP RNAiRU486-</i> | 3.61                | 4.65                | 91     |                           |
| <i>daGS;InRDN&gt;GFP RNAiRU486+</i> | 4.13                | 6.61                | 92     | 3.34E-08                  |
| <i>daGS;InRDN&gt;fkh RNAiRU486-</i> | 3.19                | 4.65                | 100    |                           |
| <i>daGS;InRDN&gt;fkh RNAiRU486+</i> | 4.13                | -                   | 104    | 2.32E-12                  |

**C. Starvation resistance data for daGS;UAS-InRDN>GFP RNAi or FKH RNAi +/-RU486 (related to Figure 4C)**

| Genotype/Treatment        | Med Survival (days) | Max Survival (days) | n Dead | p-value (log rank) vs -RU |
|---------------------------|---------------------|---------------------|--------|---------------------------|
| Repeat 1                  |                     |                     |        |                           |
| daGS;InRDN>GFP RNAiRU486- | 7.64                | 8.61                | 102    |                           |
| daGS;InRDN>GFP RNAiRU486+ | 8.61                | 9.51                | 95     | 3.67E-05                  |
| daGS;InRDN>fkh RNAiRU486- | 7.64                | 8.61                | 105    |                           |
| daGS;InRDN>fkh RNAiRU486+ | 7.64                | 8.61                | 101    | 0.085                     |

| Genotype/Treatment        | Med Survival (days) | Max Survival (days) | n Dead | p-value (log rank) vs -RU |
|---------------------------|---------------------|---------------------|--------|---------------------------|
| Repeat 2                  |                     |                     |        |                           |
| daGS;InRDN>GFP RNAiRU486- | 6.99                | 8.63                | 90     |                           |
| daGS;InRDN>GFP RNAiRU486+ | 7.60                | 9.54                | 88     | 5.58E-04                  |
| daGS;InRDN>fkh RNAiRU486- | 6.15                | 7.60                | 96     |                           |
| daGS;InRDN>fkh RNAiRU486+ | 6.21                | 6.55                | 92     | 0.70                      |

**Table S5- Intestinal overexpression of FKH extends lifespan. Related to Figures 5 and 7E.**

**A. Survival data for TiGS>UAS-fkh (related to Figure 5A)**

| Genotype/Treatment | Med Lifespan (days) | Max Lifespan (days) | n Dead | n Censored | % Median change | % Maximum change | p-value (log rank) vs control |
|--------------------|---------------------|---------------------|--------|------------|-----------------|------------------|-------------------------------|
| Repeat 1           |                     |                     |        |            |                 |                  |                               |
| RU486-             | 66                  | 78                  | 219    | 7          |                 |                  |                               |
| RU486+             | 69                  | 82                  | 212    | 5          | 4.5             | 5.13             | 0.001049071                   |
| Repeat 2           |                     |                     |        |            |                 |                  |                               |
| RU486-             | 74                  | 88                  | 148    | 3          |                 |                  |                               |
| RU486+             | 79                  | 97                  | 147    | 3          | 6.7             | 10.23            | 0.000153624                   |
| Repeat 3           |                     |                     |        |            |                 |                  |                               |
| RU486-             | 103                 | 114                 | 119    | 1          |                 |                  |                               |
| RU486+             | 108                 | 124                 | 119    | 2          | 4.8             | 8.77             | 4.16098E-05                   |

**B. Survival data for TiGS>fkh RNAi +/- rapa (related to Figure 5C)**

| Genotype/Treatment        | Med Lifespan (days) | Max Lifespan (days) | n Dead | n Censored | % Median change | % Maximum change | p-value (log rank) vs -rapa control |
|---------------------------|---------------------|---------------------|--------|------------|-----------------|------------------|-------------------------------------|
| TiGS>fkh RNAiRU486-       | 80                  | 94                  | 146    | 1          |                 |                  |                                     |
| TiGS>fkh RNAiRU486+       | 80                  | 94                  | 146    | 2          |                 |                  |                                     |
| TiGS>fkh RNAiRU486- Rapa+ | 89                  | 98                  | 148    |            | 11.25           | 4.255319149      | 4.60E-10                            |
| TiGS>fkh RNAiRU486+ Rapa+ | 82                  | 91.5                | 146    | 1          |                 |                  | 0.575678595                         |

C. Survival data for *TiGS>UAS-InRDN* (related to Figure 5D)

| Genotype/Treatment | Med Lifespan (days) | Max Lifespan (days) | n Dead | n Censored | % Median change | % Maximum change | p-value (log rank) vs control |
|--------------------|---------------------|---------------------|--------|------------|-----------------|------------------|-------------------------------|
| Repeat 1           |                     |                     |        |            |                 |                  |                               |
| RU486-             | 85                  | 104                 | 147    | 3          |                 |                  | 0.014845219                   |
| RU486+             | 87.5                | 116.5               | 141    | 9          | 3               | 12               |                               |
| Repeat 2           |                     |                     |        |            |                 |                  |                               |
| RU486-             | 76                  | 92                  | 131    | 5          |                 |                  | 0.000289316                   |
| RU486+             | 80.5                | 101.5               | 142    | 4          | 6               | 10.3             |                               |

D. Survival data for *TiGS;UAS-fkh RNAi> UAS-InRDN* (related to Figure 5E)

| Genotype/Treatment | Med Lifespan (days) | Max Lifespan (days) | n Dead | n Censored | % Median change | % Maximum change | p-value (log rank) vs control |
|--------------------|---------------------|---------------------|--------|------------|-----------------|------------------|-------------------------------|
| Repeat 1           |                     |                     |        |            |                 |                  |                               |
| RU486-             | 83                  | 94.5                | 126    | 15         |                 |                  | 8.97448E-07                   |
| RU486+             | 73                  | 87                  | 136    | 4          | -12             | -7               |                               |
| Repeat 2           |                     |                     |        |            |                 |                  |                               |
| RU486-             | 78                  | 87.5                | 134    | 7          |                 |                  | 0.000300082                   |
| RU486+             | 73.5                | 87.5                | 145    | 3          | -5.7            | 0                |                               |

E. Survival data for *TiGS>UAS-fkh RNAi* (related to Figure 5E)

| Genotype/Treatment | Med Lifespan (days) | Max Lifespan (days) | n Dead | n Censored | % Median change | % Maximum change | p-value (log rank) vs control |
|--------------------|---------------------|---------------------|--------|------------|-----------------|------------------|-------------------------------|
| Repeat 1           |                     |                     |        |            |                 |                  |                               |
| RU486-             | 87.5                | 105                 | 144    | 1          |                 |                  | 0.08                          |
| RU486+             | 83                  | 106                 | 141    | 1          |                 |                  |                               |
| Repeat 2           |                     |                     |        |            |                 |                  |                               |
| RU486-             | 78                  | 92                  | 89     | 3          |                 |                  | 0.829119039                   |
| RU486+             | 76                  | 94                  | 79     | 10         |                 |                  |                               |

F. Survival data for *G55966>UAS-fkh* (related to Figure 7E)

| Genotype/Treatment | Med Lifespan (days) | Max Lifespan (days) | n Dead | n Censored | % Median change | % Maximum change | p-value (log rank) vs control |
|--------------------|---------------------|---------------------|--------|------------|-----------------|------------------|-------------------------------|
| RU486-             | 71                  | 87                  | 139    | 12         |                 |                  | 2.03614E-07                   |
| RU486+             | 82                  | 92                  | 139    | 8          | 15.4929577      | 5.747126437      |                               |

**Table S6- FKH is required for reduced IIS-induced longevity. Related to Figures S2B-D.**

**A. Survival data for *daGS;UAS-InRDN>GFP RNAi +/-RU486* (related to Figure S2B)**

| Genotype/Treatment                  | Med Lifespan (days) | Max Lifespan (days) | n Dead | n Censored | % Median change (vs -RU) | % Maximum change (vs -RU) | p-value (log rank) vs control |
|-------------------------------------|---------------------|---------------------|--------|------------|--------------------------|---------------------------|-------------------------------|
| <i>daGS&gt;GFP RNAiRU486-</i>       | 90.5                | 87.5                | 144    | 4          |                          |                           |                               |
| <i>daGS&gt;GFP RNAiRU486+</i>       | 90.5                | 87.5                | 143    | 2          | 0.00                     | 0.00                      | 0.79                          |
| <i>daGS;InRDN&gt;GFP RNAiRU486-</i> | 76.0                | 80.5                | 131    | 2          |                          |                           |                               |
| <i>daGS;InRDN&gt;GFP RNAiRU486+</i> | 80.5                | 92                  | 146    | 4          | 5.92                     | 14.29                     | 7.91E-11                      |

**B. Survival data for *daGS;UAS-InRDN>fkh RNAi 2 +/-RU486* (related to Figure S2C)**

| Genotype/Treatment                     | Med Lifespan (days) | Max lifespan (days) | n Dead | n Censored | % Median change (vs -RU)            | % Maximum change (vs -RU) | p-value (log rank) |
|----------------------------------------|---------------------|---------------------|--------|------------|-------------------------------------|---------------------------|--------------------|
| <i>daGS&gt;fkh RNAi2 RU486-</i>        | 80.5                | 92                  | 134    | 7          |                                     |                           |                    |
| <i>daGS&gt;fkh RNAi 2 RU486+</i>       | 76                  | 87.5                | 149    | 1          | -5.590062112                        | -4.8913043                | 0.007503122        |
| <i>daGS;InRDN&gt;fkh RNAi 2 RU486-</i> | 80.5                | 92                  | 143    | 3          |                                     |                           |                    |
| <i>daGS;InRDN&gt;fkh RNAi 2 RU486+</i> | 76                  | 90                  | 123    | 7          | -5.590062112                        | -2.173913                 | 0.019521489        |
|                                        |                     |                     |        |            | <i>daGS&gt;fkh RNAiRU486</i>        | vs.                       | <b>0.623024154</b> |
|                                        |                     |                     |        |            | <i>daGS;InRDN&gt;fkh RNAiRU486+</i> |                           |                    |

**D. Survival data for *daGS;chico> UAS-fkh RNAi*(related to Figure S2D)**

| Genotype/Treatment                    | Med Lifespan (days) | Max Lifespan (days) | n Dead | n Censored | % Median change (vs wt) | % Maximum change (vs wt) | p-value (log rank) |
|---------------------------------------|---------------------|---------------------|--------|------------|-------------------------|--------------------------|--------------------|
| <i>daGS&gt;fkh RNAi2 RU486-</i>       | 83                  | 101.5               | 112    |            |                         |                          |                    |
| <i>daGS&gt;fkh RNAi2 RU486+</i>       | 85                  | 106                 | 118    | 1          |                         |                          |                    |
| <i>chico;daGS&gt;fkh RNAi2 RU486-</i> | 87.5                | 120                 | 77     | 3          | 5.42                    | 18.23                    | 3.15E-04           |
| <i>chico;daGS&gt;fkh RNAi2 RU486+</i> | 85                  | 103                 | 78     | 3          |                         | -2.83                    | 0.80               |



**Table S7- GFP or FKH RNAi alone does not affect survival to stress. Related to Figure S4.**

**A. Paraquat resistance data for *daGS>GFP RNAi* or *FKH RNAi +/-RU486* (related to Figure S4A)**

| <b>Genotype/Treatment</b> | <b>Med Survival<br/>(days)</b> | <b>Max Survival<br/>(days)</b> | <b>n Dead</b> | <b>-value (log rank)<br/>vs -RU</b> |
|---------------------------|--------------------------------|--------------------------------|---------------|-------------------------------------|
| daGS>GFP RNAiRU486-       | 1.24                           | 2.23                           | 97            |                                     |
| daGS>GFP RNAiRU486+       | 1.24                           | 2.23                           | 98            | 7.29E-02                            |
| daGS>fkh RNAiRU486-       | 1.24                           | 2.23                           | 102           |                                     |
| daGS>fkh RNAiRU486+       | 1.24                           | 2.23                           | 95            | 7.32E-01                            |

**B. DDT resistance data for *daGS>GFP RNAi* or *FKH RNAi +/-RU486* (related to Figure S4B)**

| <b>Genotype/Treatment</b> | <b>Med Survival<br/>(days)</b> | <b>Max Survival<br/>(days)</b> | <b>n Dead</b> | <b>-value (log rank)<br/>vs -RU</b> |
|---------------------------|--------------------------------|--------------------------------|---------------|-------------------------------------|
| daGS>GFP RNAiRU486-       | 2.55                           | 2.55                           | 99            |                                     |
| daGS>GFP RNAiRU486+       | 2.55                           | 2.55                           | 100           | 9.30E-01                            |
| daGS>fkh RNAiRU486-       | 2.55                           | 3.70                           | 101           |                                     |
| daGS>fkh RNAiRU486+       | 2.55                           | 3.70                           | 99            | 4.41E-01                            |

**C. Starvation resistance data for *daGS>GFP RNAi* or *FKH RNAi +/-RU486* (related to Figure S4C)**

| <b>Genotype/Treatment</b> | <b>Med Survival<br/>(days)</b> | <b>Max Survival<br/>(days)</b> | <b>n Dead</b> | <b>-value (log rank)<br/>vs -RU</b> |
|---------------------------|--------------------------------|--------------------------------|---------------|-------------------------------------|
| daGS>GFP RNAiRU486-       | 8.23                           | 10.56                          | 99            |                                     |
| daGS>GFP RNAiRU486+       | 7.60                           | 9.54                           | 94            | 9.47E-01                            |
| daGS>fkh RNAiRU486-       | 8.23                           | 9.54                           | 96            |                                     |
| daGS>fkh RNAiRU486+       | 7.60                           | 8.63                           | 94            | 1.23E-01                            |

**Table S8- Survival data Related to Figure S5****A. Survival data for S106>UAS-fkh (related to Figure S5A)**

| Genotype/Treatment | Med Lifespan (days) | Max lifespan (days) | n Dead | n Censored | % Median change | % Maximum change | p-value (log rank) vs control |
|--------------------|---------------------|---------------------|--------|------------|-----------------|------------------|-------------------------------|
| RU486-             | 68.5                | 85                  | 211    | 6          |                 |                  |                               |
| RU486+             | 68.5                | 85                  | 209    | 6          |                 |                  | 0.093464441                   |

**B. Survival data for GS5961>UAS-fkh (related to Figure S5B)**

| Genotype/Treatment | Median Lifespan (days) | Maximum lifespan (days) | n Dead | n Censored | % Median change | % Maximum change | p-value (log rank) vs control |
|--------------------|------------------------|-------------------------|--------|------------|-----------------|------------------|-------------------------------|
| RU486-             | 80                     | 99                      | 134    | 9          |                 |                  |                               |
| RU486+             | 82.5                   | 101                     | 132    | 6          |                 |                  | 0.215031421                   |

**C. Survival data for UAS-fkh>+ (related to Figure S5D)**

| Genotype/Treatment | Median Lifespan (days) | Maximum lifespan (days) | n Dead | n Censored | % Median change | % Maximum change | p-value (log rank) vs control |
|--------------------|------------------------|-------------------------|--------|------------|-----------------|------------------|-------------------------------|
| RU486-             | 78.5                   | 90                      | 85     | 7          |                 |                  |                               |
| RU486+             | 78.5                   | 92.5                    | 86     |            |                 |                  | 0.484519478                   |

**D. Survival data for daGS>+ (related to Figure S5E)**

| Genotype/Treatment | Median Lifespan (days) | Maximum lifespan (days) | n Dead | n Censored | % Median change | % Maximum change | p-value (log rank) vs control |
|--------------------|------------------------|-------------------------|--------|------------|-----------------|------------------|-------------------------------|
| RU486-             | 80                     | 93                      | 94     | 2          |                 |                  |                               |
| RU486+             | 80                     | 93                      | 95     | 2          |                 |                  | 0.675801839                   |

**E. Survival data for TiGS>+ (related to Figure S5F)**

| Genotype/Treatment | Median Lifespan (days) | Maximum lifespan (days) | n Dead | n Censored | % Median change | % Maximum change | p-value (log rank) vs control |
|--------------------|------------------------|-------------------------|--------|------------|-----------------|------------------|-------------------------------|
| RU486-             | 74.5                   | 88                      | 147    | 3          |                 |                  |                               |
| RU486+             | 76                     | 88                      | 144    | 4          |                 |                  | 0.83062806                    |

#### F. Survival data for GS5961>+ (related to Figure S5G)

| Genotype/Treatment | Median Lifespan (days) | Maximum lifespan (days) | n Dead | n Censored | % Median change | % Maximum change | p-value (log rank) vs control |
|--------------------|------------------------|-------------------------|--------|------------|-----------------|------------------|-------------------------------|
| RU486-             | 89                     | 106                     | 150    | 1          |                 |                  |                               |
| RU486+             | 92                     | 106                     | 143    | 2          |                 |                  | 0.38072779                    |

#### G. Survival data for S106>+ (related to Figure S5H)

| Genotype/Treatment | Median Lifespan (days) | Maximum lifespan (days) | n Dead | n Censored | % Median change | % Maximum change | p-value (log rank) vs control |
|--------------------|------------------------|-------------------------|--------|------------|-----------------|------------------|-------------------------------|
| RU486-             | 75                     | 86                      | 135    | 4          |                 |                  |                               |
| RU486+             | 74                     | 87.5                    | 134    | 4          |                 |                  | 0.489215204                   |

## Supplemental Experimental Procedures

### Lifespan Experiments

RU486 (Sigma) dissolved in ethanol was added to a final concentration of 200  $\mu$ M, unless otherwise indicated. Rapamycin (LC Laboratories) was diluted in ethanol and added to SYA food at 100  $\mu$ M concentration. Stocks were backcrossed for at least six generations into the wild-type outbred *wDahomey* population. For lifespans, flies were sorted into experimental vials at a density of 10 or 15 flies per vial. Flies were transferred to fresh vials three times a week, and deaths/censors were scored during the transfer.

### Fly Stocks

The following stocks were used: *UAS-InR<sup>DN</sup>* (*K1409A*) and *UAS-GFP-RNAi* stocks were obtained from the Bloomington Stock Centre. *UAS-fkh-RNAi* line was obtained from Vienna stock center (37062). *daGS* was kindly provided by Veronique Monnier (Tricoire et al., 2009). *TiGS* and *S<sub>1</sub>106* drivers were described in Poirier et al. 2008 (Poirier et al., 2008). The alternative *UAS-fkh-RNAi* (*fkh RNAi 2*) stock was kindly provided by Michael Junger (Bulow et al., 2010). *dfoxo<sup>Δ/Δ</sup>* line was described in Slack et al., 2011 (Slack et al., 2011). To create *UAS-FKH lines*, *Fork Head* genomic sequences encoding the full-length wild-type *fkh* protein sequence open reading frame were cloned into pENTR-D vector, confirmed by sequencing and transferred to the pUASg.attB (Bischof et al., 2007) P-element-based vector using standard Gateway cloning techniques (Invitrogen).

### Paraquat, DDT and Fecundity Assays

Paraquat, DDT and fecundity assays were carried out as described by Slack et al., (Slack et al., 2011) with the following modification: the final concentration of DDT used in the xenobiotic assay was increased to 0.06% (w/v) DDT.

### Dietary Restriction

The DR protocol was described in detail in Bass et al., (Bass et al., 2007)

### S2 cell culture and transfections

S2 cells were routinely cultured in Schneider's insect medium (Sigma) supplemented with 10% FBS. S2 cell transfections were carried out by using Effectene transfection reagent (Qiagen) according to manufacturer's instructions. To express FKH-HA and dAKT-FLAG in S2 cells, full length wild type FKH and dAKT open reading frames were cloned into pAHW and pAFW *Drosophila* Gateway vectors (a gift from Martin Junger) respectively by using standard Gateway cloning techniques (Invitrogen).

### Preparation of PhosTag SDS-PAGE Gels

24 hour following transfections, S2 cells were serum starved for 2 hours and stimulated with 1  $\mu$ M human insulin (Sigma) for the indicated duration. Protein extracts were prepared by lysing the cells in RIPA buffer (NEB labs) containing PhoSTOP (Roche) and Complete Protease inhibitors (Roche). SDS-PAGE gels were prepared at 7.5% acrylamide concentration and contained 50 mM Phos-Tag<sup>TM</sup> (Wako). Gels were run at 50 V until samples entered the top one third of the resolving gel at which point the voltage was increased to 140 V.

### Immunoprecipitation

Prior to immunoprecipitations (IPs), S2 cells were stimulated with 1  $\mu$ M human insulin (Sigma) for 15 minutes. S2 cells were washed in cold PBS and lysed in cold lysis buffer (50 mM HEPES-KOH pH 8, 100 mM KCL, 5 mM EDTA, 10% glycerol, 0.5% NP-40) containing PhoSTOP (Roche) and Complete

Protease Inhibitors (Roche). IPs were carried out by using either anti-HA coupled agarose beads (Sigma) or anti-FLAG coupled agarose beads (Sigma, F2426) according to manufacturer's instructions.

### **Immunoblotting**

Protein samples were resolved at 140 V by SDS-PAGE on precast 4–12% Bis-Tris polyacrylamide gels (Novex) and transferred onto nitrocellulose membranes in a Trans-Blot apparatus (Biorad). Membranes were blocked in TBSTw (Tris-buffered saline (150 mM NaCl, 20 mM Tris pH 7.5) + 0.05% Tween 20) and 5% (w/v) semi-skimmed milk for 1 h at room temperature and then incubated for 1 h with primary antibody in TBSTw. After washing three times for 5 min with TBSTw, the membranes were incubated in an appropriate horseradish peroxidase-linked secondary antibody (1 : 10 000) for 1 h in TBSTw at room temperature. Finally, the membranes were washed as above in Tris-buffered saline plus 0.2% Triton X and immune-complexes detected by enhanced chemiluminescence (ECL; GE Healthcare). Primary antibodies and dilutions used were as follows: anti- HA (Sigma, H3663) 1:2000; rabbit anti-FKH (Abrams et al., 2006) (gift from Prof Deborah Andrew) 1:1000; anti-FLAG (Sigma, F3165) 1:2000. Secondary antibodies and dilutions used were as follows: goat anti-rabbit (abcam, ab6721) 1:5000; goat anti-mouse (Abcam, ab6789) 1:5000.

### **Immunohistochemistry on adult guts**

The following antibodies were used in immunohistochemistry of guts; primary antibodies: rabbit anti-FKH (Abrams et al., 2006) (gift from Prof Deborah Andrew) 1:1000, rabbit anti-PH3 (Cell Signalling 9701) 1:500. Nile Red was diluted in PBS at 1:2000 from the stock solution prepared at 0.5mg/ml in acetone. Secondary antibodies: Alexa Fluor 488 donkey anti-rabbit (A21206) 1:1000. Guts were dissected in ice cold PBS. Insulin stimulation involved incubation of adult guts at room temperature in Schneider's medium (Sigma) containing 1  $\mu$ M human insulin (Sigma). Guts were immediately fixed in 4% formaldehyde for 15 minutes, serially dehydrated in MeOH, stored at -20°C, and subsequently stained. Guts were washed in 0.2% 331 Triton-X / PBS, blocked in 5% bovine serum albumin / PBS, incubated in primary antibody overnight at 4 °C and in secondary for 2 h at RT. 10-15 guts per condition were mounted, scored and imaged as described above.

### **Immunohistochemistry on S2 cells**

The following antibodies were used in immunohistochemistry of S2 cells; primary antibodies: mouse anti-HA (Sigma, H3663) 1:1000. Secondary antibodies: Alexa Fluor594 phalloidin (A12381) 1:1000; Alexa Fluor 488 donkey anti-rabbit (A21206) 1:1000. S2 cells were cultured on Concanavalin A coated coverslips in six-well plates overnight. Cells were rinsed in PBS for 3 min followed by a 3 min fixation in PBS containing 4 % paraformaldehyde (diluted from 16% ampoules). The fixative was removed by a 2 min wash in PBS. Cells were permeabilised by a 5 min incubation in PBS + 0.5% Triton X-100 followed by a 1 h block in PBS containing 3 per cent BSA. Subsequently, cells were washed in PBS + 0.1% Triton X-100 for 5 min. Primary antibody was diluted in PBS + 0.3% BSA + 0.1% Triton X-100 and incubated on the cells for 1 h at room temperature. Cells were washed twice for 5 min followed by a 1 h secondary antibody incubation diluted in PBS + 0.3% BSA + 0.1% Triton X-100. Subsequently, 45 min washes were performed in PBS + 0.1% Triton X-100. DAPI was included in the penultimate wash at 0.1  $\mu$ g ml<sup>-1</sup> concentration.

### **Imaging**

Images were captured using the Zeiss LSM 700 confocal microscope and processed using ImageJ software.

### **Smurf Assay**

Gut barrier efficiency was analyzed by placing flies on blue food (minimum of 200 flies per condition at 10 week of age) prepared using 2.5% (w/v) FD&C blue dye no. 1 (Fastcolors) as previously described (Rera et al., 2012), except flies were kept 24 hours on the blue food before the Smurf phenotype was scored.

### **Generation of *Irs1* conditional KO and tissue-specific KO mice**

Generation of *Irs1loxP/loxP* mice was described in Essers et al., 2016 (Essers et al., 2016) For tissue-specific KO of *Irs1*, *Irs1loxP/loxP* mice were crossed with mice expressing Cre-recombinase under the control of the villin promoter (*VillCre* mice, The Jackson Laboratory, stock number 004586). Breeding *Irs1loxP/loxP VillCre* mice with *Irs1loxP/loxP*, produced mice with intestinal *Irs1* deletion (denoted as *VillCre::Irs1<sup>lox/lox</sup>*) and littermate controls.

### **RNA isolation and quantitative PCR**

RNA was isolated from 14 fly guts per sample or mouse small intestine with TRIzol (Invitrogen) and cDNA was synthesized by using SuperScript II Reverse Transcriptase (Invitrogen) according to manufacturers instructions. qPCR was carried out by using Power SYBR Green PCR Master Mix (ABI) on ABI Prism 7000.

The following primers sequences were used in the analysis.

Fork head (forward-ATTCGACATTCGCTGAGGTT, reverse-TCGAACATATTCCCCGAA)

*Drosophila* Actin5C (forward-CACACCAAATCTTACAAAATGTGTGA, reverse-AATCCGGCCTTGACATG)

Zip42C.1 (forward- CTGTGGAACCTTGCTGTACG, reverse-AGGTTAGGCTGTCATCACCC)

Mdr50 (forward-GGCGCCAAACTAGAGGATTC, reverse-CGTACCGAAAGAGCTGGAAG)

CtrlB (forward-ATCACGGCTCGGATGACAG, reverse-ACAGGAAGGACACCAGGAAG)

Pmp70 (forward-CCTCAGAGGCCCTACATGAC, reverse-CACGTCGATCCAGTCCTCAA)

CG1208 (forward- CCACAACCTGGCGGTATTTC, reverse- GCGGAACTAAGCGTGATCC)

MtnB (forward-AAGGGTTGTGGAACAACACTGC, reverse- GTCCTTGGGCCATTCTT)

MtnC (forward-AAAGGCTGCGGAACAACACT, reverse-ATCTTTGGGGCCATTCTTG)

Abcd3 (forward-GGGAGAAGCAGACAATCCAC, reverse-

CCGAAAGAAAATGAAATTATGTAGG)

Slc39a3 (forward-TGGCGTATTCCTGGCTACAT, reverse-GAAACCCACCATCATGAGCG)

Slc2a8 (forward- TCTTCATTGCTGGCTTTGCG, reverse-TTGGTGAGGACACAGATGCC)

Mouse Actin (forward- AACCGTGAAAAGATGACCCAG, reverse-

CACAGCCTGGATGGCTACGTA

### **Expression and Purification of FKH**

Full length, wild-type *Fork Head* coding sequence was cloned into pENTR-D-TOPO vector, transferred into pDEST17 expression vector and confirmed by sequencing. Rosetta™(DE3)pLysS Competent Cells (Novagen) were used to express the recombinant FKH. Bacterial cells were lysed via sonication in PBS+ 500 mM NaCl+ 25 mM imidazole containing Complete protease inhibitors (Roche) and lysates cleared by centrifugation. Purification of the protein was carried out on an Akta purifier system (GE Healthcare) and a Ni-NTA column. FKH was eluted with an imidazole gradient (25mM to 500 mM) in PBS + 500 mM NaCl. The fractions to be used for subsequent essays were determined by SDS-Page and Coomassie staining. Successful purification of recombinant FKH-his protein was confirmed by immunoblotting with an anti-His antibody (Sigma, H1029).

### ***In vitro* kinase reactions**

*In vitro* kinase reactions were carried out in a total volume of 30  $\mu$ l containing 1X Kinase buffer (Cell signaling, 9802)+ 10  $\mu$ M ATP + 5  $\mu$ Ci [ $\gamma$ -33P]ATP, 3 $\mu$ l of purified FKH and 0.1  $\mu$ g of recombinant kinase. Active recombinant kinases mTOR kinase (SRP0364) and Akt1 (A8729) were purchased from Sigma and GSK fusion protein was purchased from Cell signaling (9237). Kinase reactions were incubated at 30°C for 20 minutes and reactions were stopped by adding sample buffer containing 10 mM DTT. Samples were subsequently boiled at 80°C for 10 minutes and run on 4–15% Mini-PROTEAN® TGX™ Precast Protein Gels (BioRad). The gel was dried on a Whatman 3.0 paper, and exposed to autoradiogram for 24 hours by using Amersham Hyperfilm (GE Healthcare).

### **Library preparation for sequencing**

Fly guts were micro-dissected in ice-cold RNeasy lysis solution (Qiagen) and RNA was extracted using the QIAGEN total RNA isolation kit and quantified on an Agilent 2100 bioanalyser. Sample concentration and purity of RNA was measured on a NanoDrop spectrophotometer, and RNA integrity was assessed on an Agilent 2100 Bioanalyzer. Samples were processed using Illumina's TruSeq Stranded mRNA LT sample preparation kit (p/n RS-122-2101) according to manufacturer's instructions. Deviations from the protocol were as follows:

250ng total RNA was used as starting material. Fragmentation was carried out for 10mins instead of 8mins, and 14 cycles of PCR were used.

Briefly, mRNA was isolated from total RNA using Oligo dT beads to pull down Poly-Adenylated transcripts. The purified mRNA was fragmented using chemical fragmentation (heat and divalent metal cation) and primed with random hexamers. Strand-specific first strand cDNA was generated using Reverse Transcriptase and Actinomycin D. This allows for RNA dependent synthesis while preventing spurious DNA-dependent synthesis. The second cDNA strand was synthesised using dUTP in place of dTTP, to mark the second strand.

The resultant cDNA is then "A-tailed" at the 3' end to prevent self-ligation and adapter dimerisation. Full length TruSeq adaptors, containing a T overhang are ligated to the A-Tailed cDNA. These adaptors contain sequences that allow the libraries to be uniquely identified by way of a 6bp Index sequence. Successfully ligated fragments were enriched with 14 cycles of PCR. The polymerase is

unable to read through uracil, so only the first strand is amplified, thus making the library strand-specific.

### **Sequencing**

Libraries to be multiplexed in the same run were pooled in equimolar quantities, calculated from Qubit and Bioanalyser fragment analysis.

Samples were sequenced on the NextSeq 500 instrument (Illumina, San Diego, US) using a 43bp paired end run resulting in >15million reads per sample. Sequencing was carried out by UCL Genomics at the UCL GOS Institute of Child Health.

### **Alignment and differential expression of RNA-seq data**

Initial quality control of the raw files (fastq) was performed using FastQC (v0.11.4, <http://www.bioinformatics.babraham.ac.uk/projects/fastqc/>). The raw RNA-seq data comprised paired-end reads with read length of 43bp. Reads were aligned to the *Drosophila* reference genome (Ensembl BDGP6 release 84 and *Wolbachia* NCBI NC\_002978.6) using tophat2(Trapnell et al., 2009) (--library fr-firststrand --no-coverage-search --keep-fastq-order --segment-length 20 --segment-mismatches 1). Additionally, we estimated the tophat's insert distance (--mate-inner-dist) and standard deviation (--mate-std-dev) by aligning the first 1M reads. Aligned reads were filtered by removing non-primary alignments, unmapped reads and mates, reads not mapped in proper pairs and alignments with MAPQ <20, using samtools(Li et al., 2009) (v1.3.1; -F 0x100 -F 0x004 -F 0x008 -q 20 -f 0x002). Read counts per gene identifier were computed using htseq-count(Anders et al., 2015) (v0.6.0; --stranded=reverse -t exon --idattr=gene\_id --mode=intersection-strict). Differentially expressed genes were determined using DESeq2(Love et al., 2014) (v1.10.1) with default parameters. Genes were deemed differentially expressed if p-value  $\leq 0.05$  following a Benjamini and Hochberg correction for multiple hypothesis testing (default parameter in DESeq2).

### **Functional annotation and gene-set enrichment analysis**

The Wilcoxon rank sum test, as implemented in Catmap (Breslin et al., 2004), was used to perform functional analysis, ie significant enrichment of Gene Ontology (GO) categories. FlyBase's (<http://flybase.org>) gene identifiers were mapped to Gene Ontology identifiers (FlyBase version FB2016\_04). Ranks of genes were based on the p-value derived from the DESeq2 analysis for differential expression. GO categories were deemed statistically significant if the p-value derived from the Wilcoxon rank sum test was  $\leq 0.05$  after Benjamini and Hochberg correction for multiple hypothesis testing. Gene lists were sorted by log-fold change and p-value. For all experiments three sets of lists were derived; a gene list comprising most differentially up-regulated (log-fold change > 0) genes at the top of the list and most differentially down-regulated genes (log-fold change < 0) at the bottom of the list (termed up-to-down) and vice versa (termed down-to-up). Additionally, a list comprising genes sorted by p-value only was also generated. These ranked lists of genes were used to generate significance of GO categories. If a GO category was found to be statistically significant in the up-to-down list, this GO was referred to as up-regulated, i.e. a large enough proportion of the genes that are part of this GO category were found to be up-regulated or at the top of the list. If a GO category was found to be statistically significant in the down-to-up list, this GO was referred to as down-regulated, i.e. a large enough proportion of the genes that are part of this GO category were found to be down-regulated or at the top of the list. GO categories were deemed to be statistically significant if the p-value was  $\leq 0.05$  after Benjamini and Hochberg correction for multiple hypothesis testing.

### **Statistical significance of differential expression gene sets**

Statistical significance of overlaps of genes in two expression experiments was determined using Fisher's exact test. To account for multiple hypotheses testing, a p-value cut-off of  $\leq 1.0 \times 10^{-5}$  was used. Statistical significance of GO term enrichment in genes that overlapped between two experiments was determined using a hypergeometric test in R.

### **Ecc15 infection**

*Erwinia carotovora carotovora15* (Ecc15) was grown in LB overnight at 30 °C and overnight cultures were spun down and pelleted and resuspended in a very small volume of fresh LB. OD was measured at 600 nm and cultures were resuspended so that the final OD<sub>600</sub> = 200. Flies were pricked with a needle dipped in the bacterial solution in the thorax just above the right wing. As a control same number of flies were pricked with a needle dipped in LB alone and survival was monitored over the following 7-8 days.

## SUPPLEMENTAL REFERENCES

- Abrams, E.W., Mihoulides, W.K., and Andrew, D.J. (2006). Fork head and Sage maintain a uniform and patent salivary gland lumen through regulation of two downstream target genes, PH4alphaSG1 and PH4alphaSG2. *Development* *133*, 3517-3527.
- Anders, S., Pyl, P.T., and Huber, W. (2015). HTSeq--a Python framework to work with high-throughput sequencing data. *Bioinformatics* *31*, 166-169.
- Bass, T.M., Grandison, R.C., Wong, R., Martinez, P., Partridge, L., and Piper, M.D. (2007). Optimization of dietary restriction protocols in *Drosophila*. *J Gerontol A Biol Sci Med Sci* *62*, 1071-1081.
- Bischof, J., Maeda, R.K., Hediger, M., Karch, F., and Basler, K. (2007). An optimized transgenesis system for *Drosophila* using germ-line-specific phiC31 integrases. *Proceedings of the National Academy of Sciences of the United States of America* *104*, 3312-3317.
- Breslin, T., Eden, P., and Krogh, M. (2004). Comparing functional annotation analyses with Catmap. *BMC Bioinformatics* *5*, 193.
- Bulow, M.H., Aebbersold, R., Pankratz, M.J., and Junger, M.A. (2010). The *Drosophila* FoxA ortholog Fork head regulates growth and gene expression downstream of Target of rapamycin. *PloS one* *5*, e15171.
- Essers, P., Tain, L.S., Nespital, T., Goncalves, J., Froehlich, J., and Partridge, L. (2016). Reduced insulin/insulin-like growth factor signaling decreases translation in *Drosophila* and mice. *Sci Rep* *6*, 30290.
- Li, H., Handsaker, B., Wysoker, A., Fennell, T., Ruan, J., Homer, N., Marth, G., Abecasis, G., Durbin, R., and Genome Project Data Processing, S. (2009). The Sequence Alignment/Map format and SAMtools. *Bioinformatics* *25*, 2078-2079.
- Love, M.I., Huber, W., and Anders, S. (2014). Moderated estimation of fold change and dispersion for RNA-seq data with DESeq2. *Genome Biol* *15*, 550.
- Poirier, L., Shane, A., Zheng, J., and Seroude, L. (2008). Characterization of the *Drosophila* gene-switch system in aging studies: a cautionary tale. *Aging cell* *7*, 758-770.
- Rera, M., Clark, R.I., and Walker, D.W. (2012). Intestinal barrier dysfunction links metabolic and inflammatory markers of aging to death in *Drosophila*. *Proceedings of the National Academy of Sciences of the United States of America* *109*, 21528-21533.
- Slack, C., Giannakou, M.E., Foley, A., Goss, M., and Partridge, L. (2011). dFOXO-independent effects of reduced insulin-like signaling in *Drosophila*. *Aging cell* *10*, 735-748.
- Trapnell, C., Pachter, L., and Salzberg, S.L. (2009). TopHat: discovering splice junctions with RNA-Seq. *Bioinformatics* *25*, 1105-1111.
- Tricoire, H., Battisti, V., Trannoy, S., Lasbleiz, C., Pret, A.M., and Monnier, V. (2009). The steroid hormone receptor EcR finely modulates *Drosophila* lifespan during adulthood in a sex-specific manner. *Mechanisms of ageing and development* *130*, 547-552.
